# Supplementary material for: Functionalisation of vitamin B12 derivatives with a cobalt β-phenyl ligand boosters antimetabolite activity in bacteria
Source: Royal Society of Chemistry journal article supplement (doi:10.1039/d2ra05748d), 2022-01-01
Supplement: d2ra05748d1.pdf [file d2ra05748d1.pdf]

## Supporting Information

### **Functionalisation of Vitamin B<sub>12</sub> Derivatives with a Cobalt β-Phenyl Ligand Boosters Antimetabolite Activity in Bacteria**

Dr. Christopher Brenig, Paula Daniela Mestizo and Prof. Dr. Felix Zelder\*

*Department of Chemistry, University of Zurich, Winterthurerstrasse 190, CH-8057 Zurich, Switzerland. Fax: +41 44 635 6803; E-mail: [felix.zelder@chem.uzh.ch](mailto:felix.zelder@chem.uzh.ch), [www.felix-zelder.net](http://www.felix-zelder.net).*

## Contents

|                                                                                                                                                                    |     |
|--------------------------------------------------------------------------------------------------------------------------------------------------------------------|-----|
| <b>Reaction Schemes.</b>                                                                                                                                           | S4  |
| - <b>Scheme S1</b>                                                                                                                                                 | S4  |
| Synthesis of Co $\beta$ -cyanocobalamin- <i>c</i> ,8-lactam ( <b>2</b> )                                                                                           |     |
| - <b>Scheme S2</b>                                                                                                                                                 | S4  |
| Synthesis of Co $\beta$ -aqua-cobalamin- <i>c</i> ,8-lactam acetate ( <b>3</b> )                                                                                   |     |
| - <b>Scheme S3</b>                                                                                                                                                 | S4  |
| Synthesis of Co $\beta$ -phenylcobalamin- <i>c</i> ,8-lactam ( <b>4</b> )                                                                                          |     |
| - <b>Scheme S4</b>                                                                                                                                                 | S5  |
| Synthesis of 10-bromo-Co $\beta$ -cyanocobalamin ( <b>5</b> )                                                                                                      |     |
| - <b>Scheme S5</b>                                                                                                                                                 | S5  |
| Synthesis of 10-bromo-Co $\beta$ -aquacobalamin tetrafluoroborate ( <b>6</b> )                                                                                     |     |
| - <b>Scheme S6</b>                                                                                                                                                 | S5  |
| Synthesis of 10-bromo-Co $\beta$ -phenylcobalamin ( <b>7</b> )                                                                                                     |     |
| <b>Atom Numbering.</b>                                                                                                                                             | S6  |
| - <b>Figure S1</b>                                                                                                                                                 | S6  |
| Atom numbering of vitamin B <sub>12</sub> ( <b>1</b> ) and its analogues                                                                                           |     |
| <b>NMR and optical Spectra.</b>                                                                                                                                    | S7  |
| - <b>Figure S2</b>                                                                                                                                                 | S7  |
| <sup>1</sup> H-NMR spectrum of <b>2</b> (500 MHz, D <sub>2</sub> O (presat), 298 K, 4.1 x 10 <sup>-3</sup> M).                                                     |     |
| - <b>Figure S3</b>                                                                                                                                                 | S7  |
| UV-Vis spectrum of <b>2</b> (H <sub>2</sub> O, 4.1 x 10 <sup>-5</sup> M).                                                                                          |     |
| - <b>Figure S4</b>                                                                                                                                                 | S8  |
| - <sup>1</sup> H-NMR spectrum of <b>3</b> (500 MHz, CD <sub>3</sub> OD, 298 K, 7.3 · 10 <sup>-3</sup> M).                                                          |     |
| - <b>Figure S5</b>                                                                                                                                                 | S8  |
| UV/Vis spectrum of <b>3</b> (H <sub>2</sub> O, c = 2.2 · 10 <sup>-5</sup> M).                                                                                      |     |
| - <b>Figure S6</b>                                                                                                                                                 | S9  |
| <sup>1</sup> H-NMR spectrum of <b>4</b> (500 MHz, D <sub>2</sub> O (presat), 298 K, 1.2 x 10 <sup>-2</sup> M).                                                     |     |
| - <b>Figure S7</b>                                                                                                                                                 | S9  |
| <sup>13</sup> C-NMR spectrum of <b>4</b> (126 MHz, D <sub>2</sub> O (presat), 298 K, 1.2 x 10 <sup>-2</sup> M).                                                    |     |
| - <b>Figure S8</b>                                                                                                                                                 | S10 |
| DEPT 135-NMR spectrum of <b>4</b> (126 MHz, D <sub>2</sub> O, 298 K, 1.2 x 10 <sup>-2</sup> M).                                                                    |     |
| - <b>Figure S9</b>                                                                                                                                                 | S10 |
| <sup>1</sup> H- <sup>1</sup> H-DFQ-COSY spectrum of <b>4</b> (500 MHz, D <sub>2</sub> O, 298 K, 1024 x 2560 p, 12 scans, 1.2 x 10 <sup>-2</sup> M).                |     |
| - <b>Figure S10</b>                                                                                                                                                | S11 |
| <sup>1</sup> H- <sup>1</sup> H-NOESY spectrum of <b>4</b> (500 MHz, D <sub>2</sub> O, 298 K, 1024 x 1884 p, 16 scans, 1.2 x 10 <sup>-2</sup> M).                   |     |
| - <b>Figure S11</b>                                                                                                                                                | S11 |
| <sup>1</sup> H- <sup>13</sup> C-HSQC spectrum of <b>4</b> (500 MHz, 126 MHz, D <sub>2</sub> O (presat), 298 K, 1024 x 5120 p, 18 scans, 1.2 x 10 <sup>-2</sup> M). |     |
| - <b>Figure S12</b>                                                                                                                                                | S12 |
| <sup>1</sup> H- <sup>13</sup> C-HMBC spectrum of <b>4</b> (500 MHz, 126 MHz, D <sub>2</sub> O, 298 K, 1024 x 3000 p, 12 scans, 1.2 x 10 <sup>-2</sup> M).          |     |
| <b>Figure S13</b>                                                                                                                                                  | S12 |
| UV/Vis spectrum of <b>4</b> (H <sub>2</sub> O, 3.9 x 10 <sup>-5</sup> M).                                                                                          |     |
| - <b>Figure S14</b>                                                                                                                                                | S13 |
| <sup>1</sup> H-NMR spectrum of <b>5</b> (500 MHz, D <sub>2</sub> O (presat), 298 K, 4.9 x 10 <sup>-3</sup> M).                                                     |     |
| - <b>Figure S15</b>                                                                                                                                                | S13 |
| UV-Vis spectrum of <b>5</b> (H <sub>2</sub> O, 4.9 x 10 <sup>-5</sup> M).                                                                                          |     |
| - <b>Figure S16</b>                                                                                                                                                | S14 |
| <sup>1</sup> H-NMR spectrum of <b>7</b> (500 MHz, CD <sub>3</sub> OD (presat), 298 K, 8.7 x 10 <sup>-3</sup> M).                                                   |     |
| - <b>Figure S17</b>                                                                                                                                                | S14 |
| <sup>13</sup> C-NMR spectrum of <b>7</b> (126 MHz, CD <sub>3</sub> OD (presat), 298 K, 8.7 x 10 <sup>-3</sup> M).                                                  |     |
| - <b>Figure S18</b>                                                                                                                                                | S15 |
| <sup>1</sup> H- <sup>13</sup> C-HSQC spectrum of <b>7</b> (500 MHz, 126 MHz, CD <sub>3</sub> OD, 298 K, 1024 x 1024 p, 32 scans, 8.7 x 10 <sup>-3</sup> M).        |     |
| - <b>Figure S19</b>                                                                                                                                                | S15 |
| <sup>1</sup> H- <sup>13</sup> C-HMBC spectrum of <b>7</b> (500 MHz, 126 MHz, CD <sub>3</sub> OD, 298 K, 1024 x 2341 p, 12 scans, 8.7 x 10 <sup>-3</sup> M).        |     |
| - <b>Figure S20</b>                                                                                                                                                | S16 |
| UV/Vis spectrum of <b>7</b> (H <sub>2</sub> O, 3.5 x 10 <sup>-5</sup> M).                                                                                          |     |
| - <b>Figure S21</b>                                                                                                                                                | S16 |
| <sup>1</sup> H-NMR spectrum of <b>8</b> , <b>β-PhCbl</b> (500 MHz, D <sub>2</sub> O (presat), 298 K, 3.2 x 10 <sup>-3</sup> M).                                    |     |

- **Figure S22**

<sup>1</sup>H-NMR spectrum of **8**, **β-PhCbl** (500 MHz, D<sub>2</sub>O (presat), 298 K, 3.2 x 10<sup>-3</sup> M).

S17

## Reaction Schemes.

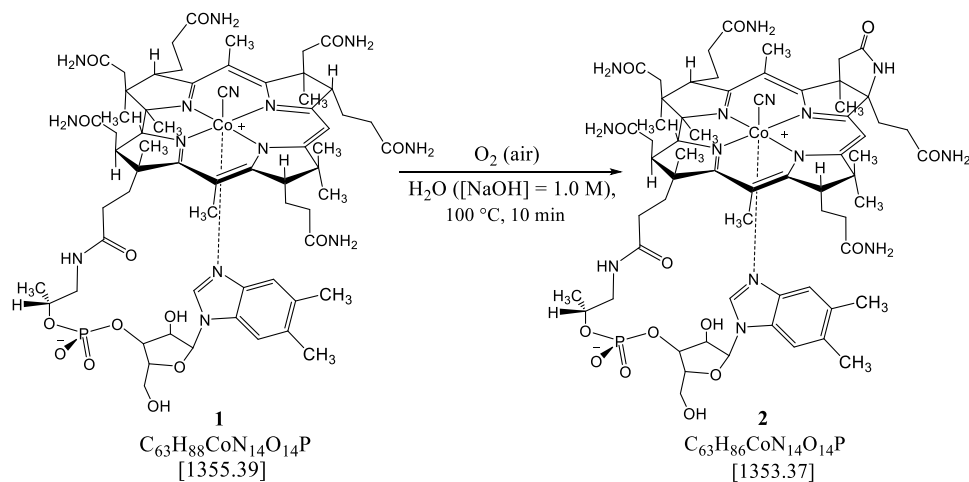

**Scheme S1.** Synthesis of  $\text{Co}_\beta$ -cyanocobalamin-*c*,8-lactam (**2**).

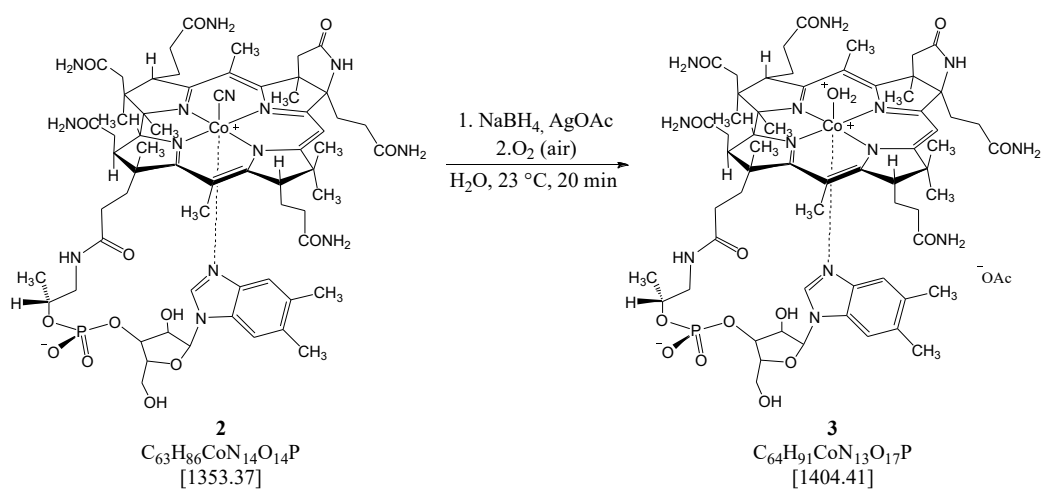

**Scheme S2.** Synthesis of  $\text{Co}_\beta$ -aquacobalamin-*c*,8-lactam acetate (**3**)

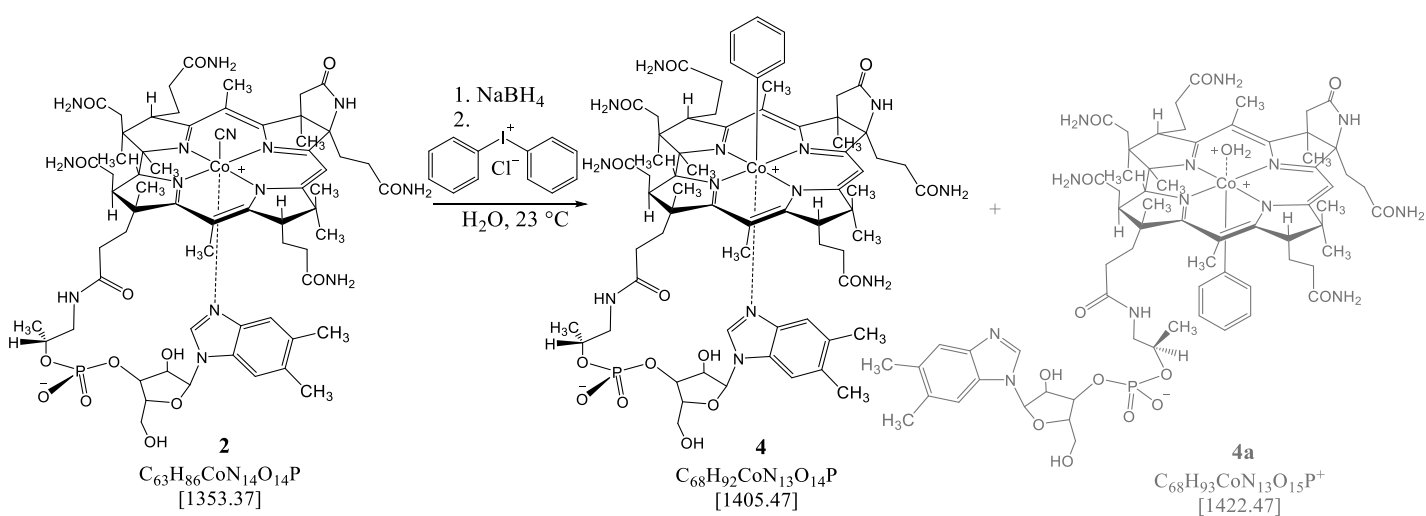

**Scheme S3.** Synthesis of  $\text{Co}_\beta$ -phenylcobalamin-*c*,8-lactam (**4**) and its side product  $\text{Co}_\alpha$ -phenylcobalamin-*c*,8-lactam (**4a**, not characterized).

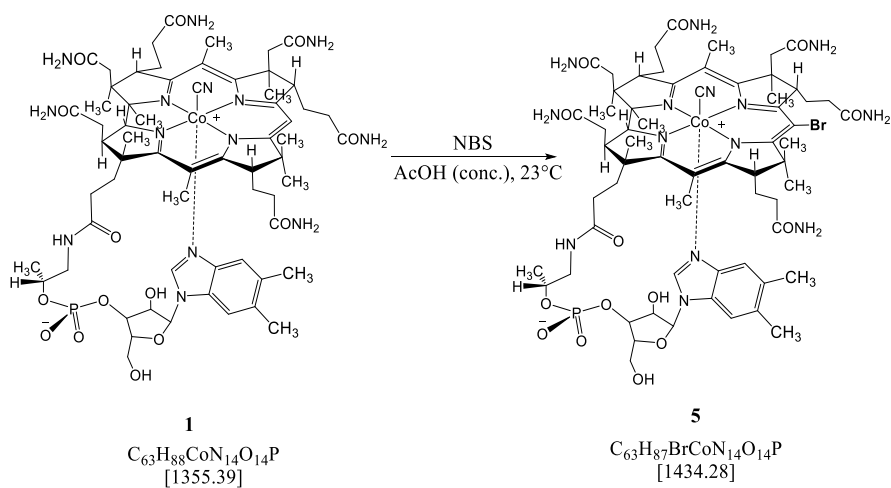

**Scheme S4.** Synthesis of 10-bromo-Co $\beta$ -cyanocobalamin (**5**).

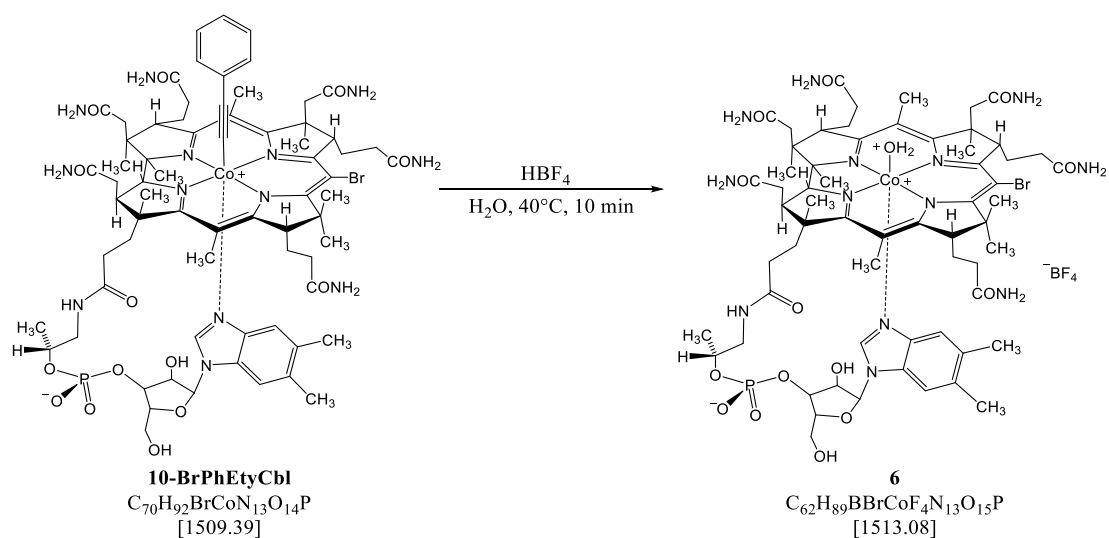

**Scheme S5.** Synthesis of 10-bromo-Co $\beta$ -aquacobalamin tetrafluoroborate (**6**) from intermediate 10-Bromo-Co $\beta$ -phenylethynylcobalamin (reported in ref<sup>[S41]</sup>).

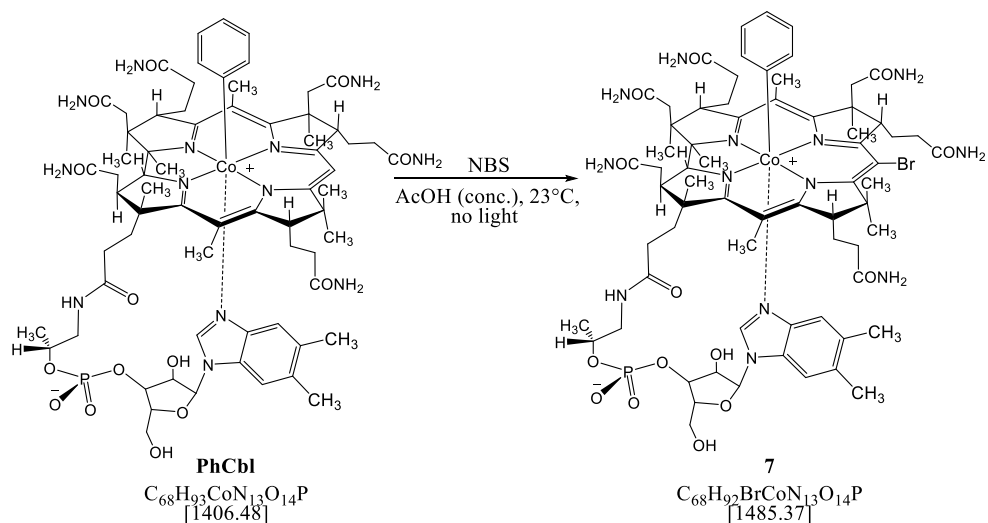

**Scheme S6.** Synthesis of 10-bromo-Co $\beta$ -phenylcobalamin (**7**) from Co $\beta$ -phenylcobalamin (reported in ref<sup>[S33]</sup>).

## Atom Numbering.

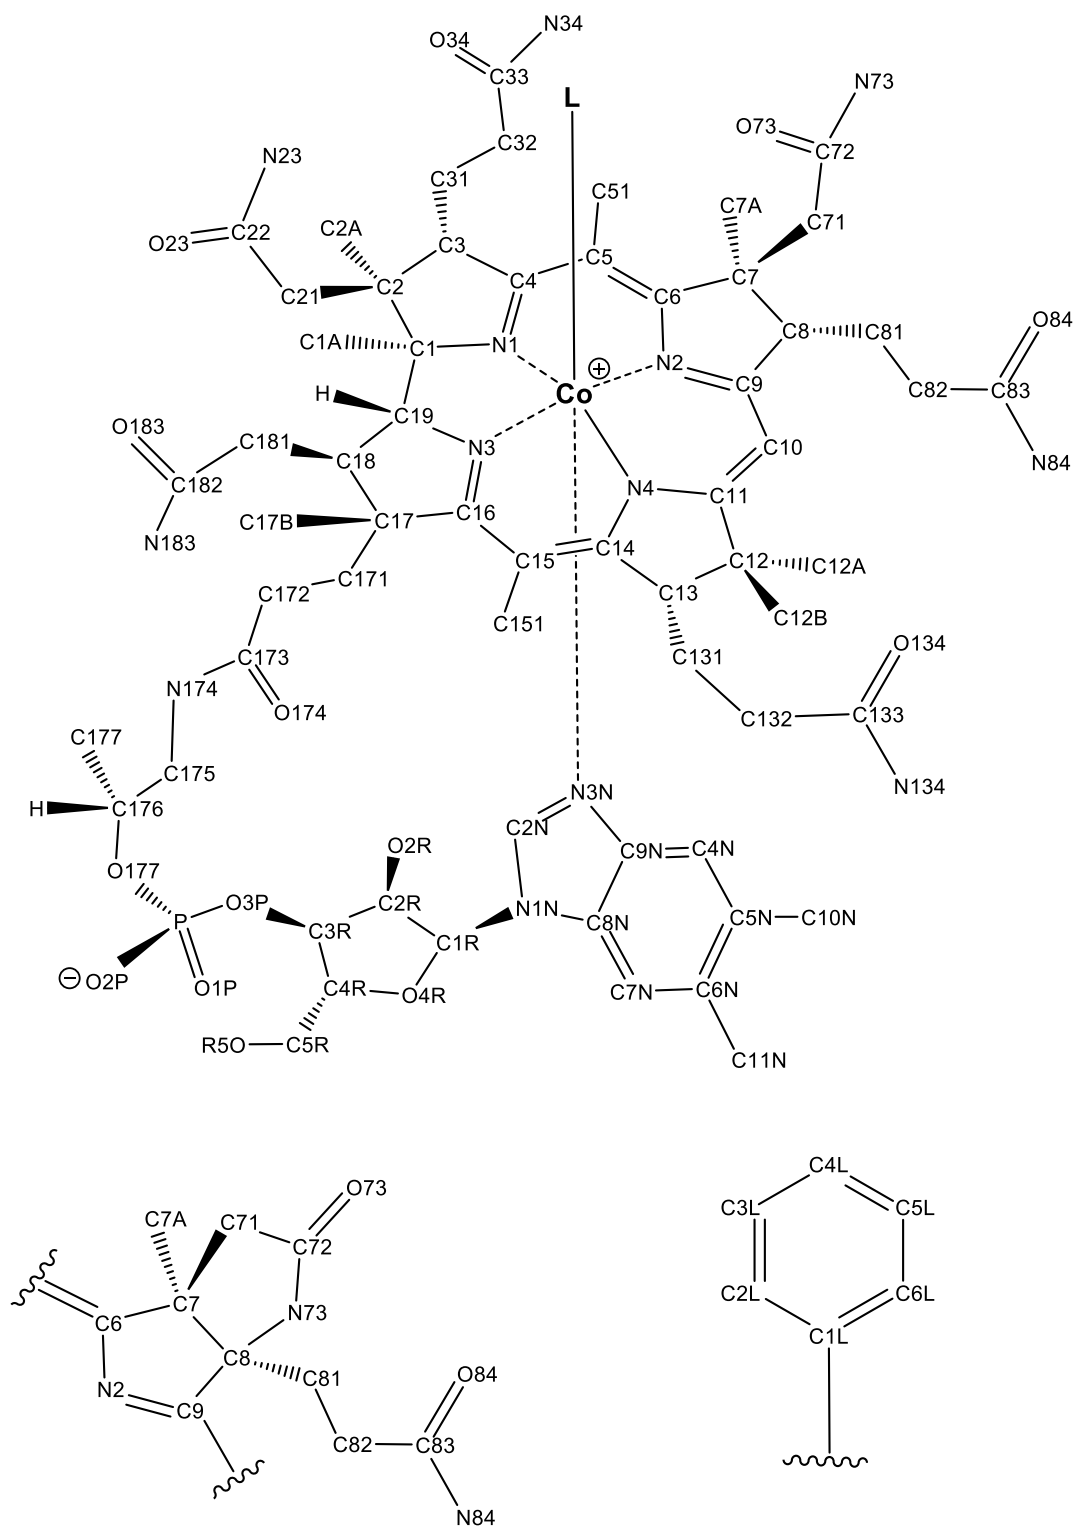

**Figure S1.** Atom numbering of vitamin B<sub>12</sub> (1) and its analogues. *Bottom:* Atom numbering of the c,8-lactam ring in derivatives 2 and 4, as well as nomenclature of the phenyl ligand of  $\beta$ -PhCbl, 4 and 7.

## NMR and optical Spectra.

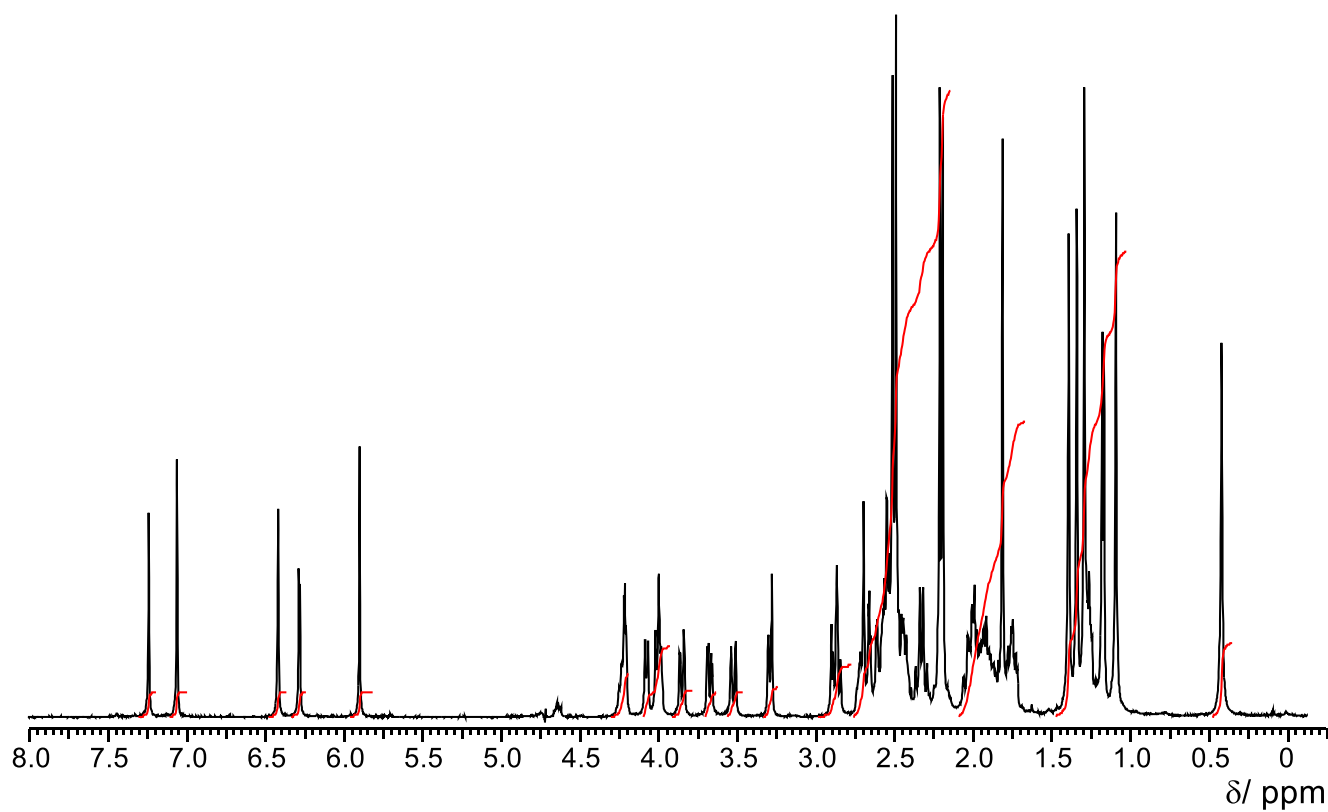

**Figure S2.** <sup>1</sup>H-NMR spectrum of **2** (500 MHz, D<sub>2</sub>O (presat), 298 K, 4.1 × 10<sup>-3</sup> M).

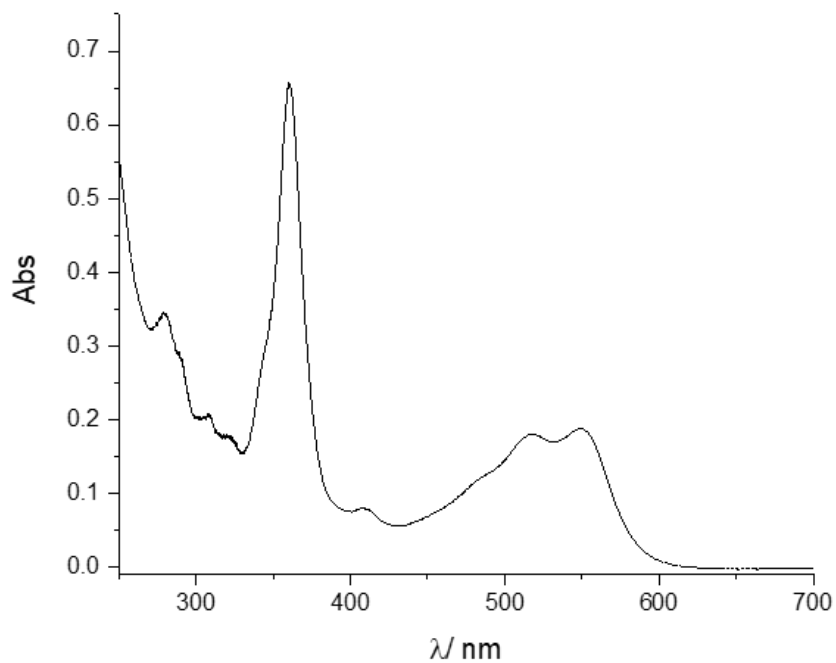

**Figure S3.** UV/Vis spectrum of **2** (H<sub>2</sub>O, 4.1 × 10<sup>-5</sup> M).

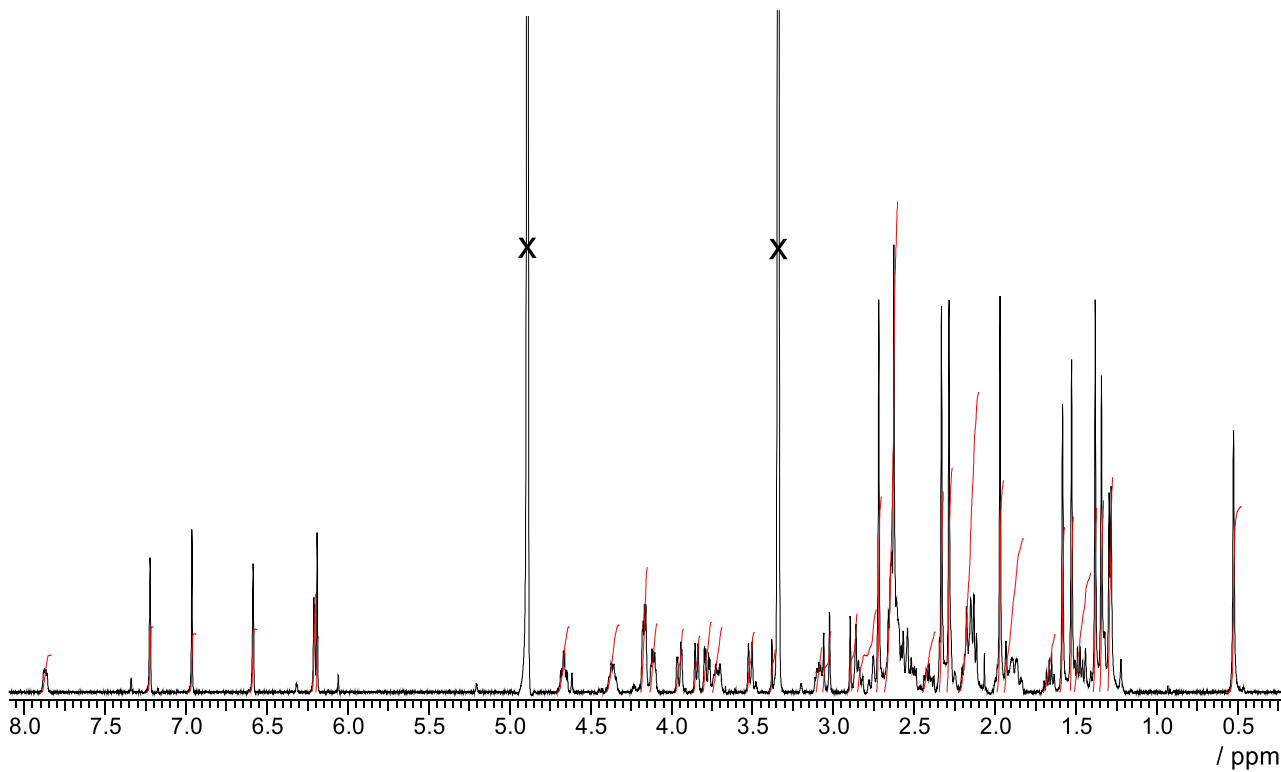

**Figure S4.**  $^1\text{H-NMR}$  spectrum of **3** (500 MHz,  $\text{CD}_3\text{OD}$ , 298 K,  $7.3 \cdot 10^{-3}$  M).

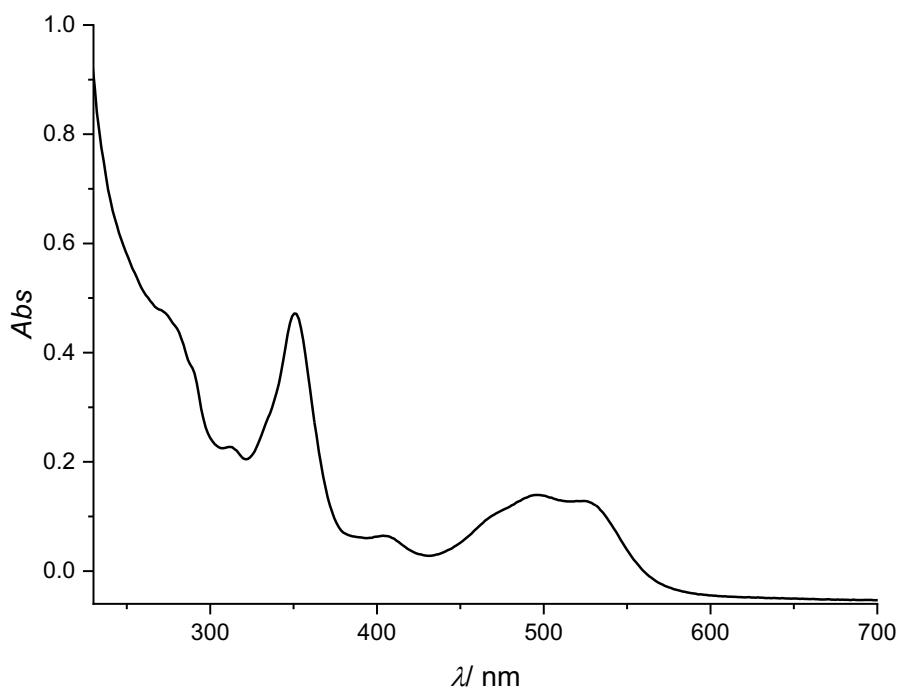

**Figure S5.** UV/Vis spectrum of **3** ( $\text{H}_2\text{O}$ ,  $c = 2.2 \cdot 10^{-5}$  M).



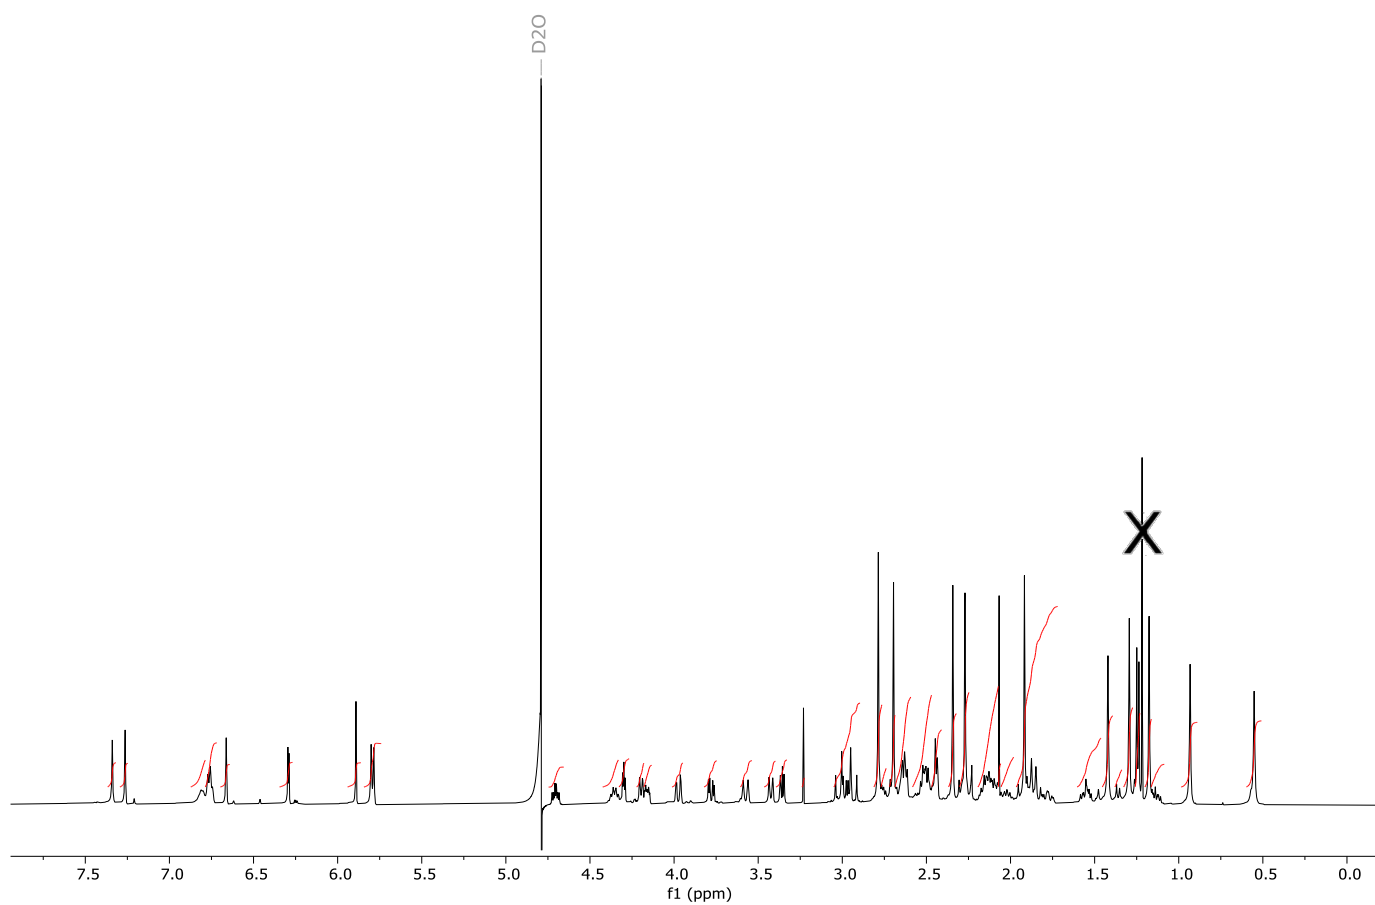

**Figure S6.**  $^1\text{H}$ -NMR spectrum of **4** (500 MHz,  $\text{D}_2\text{O}$  (presat), 298 K,  $1.2 \times 10^{-2}$  M).

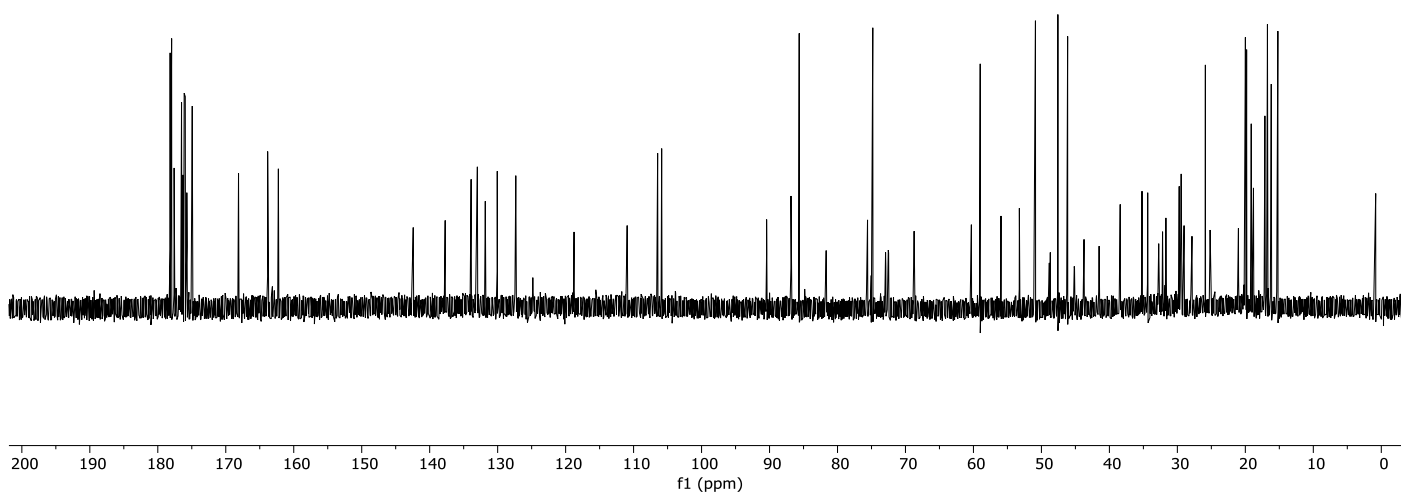

**Figure S7.**  $^{13}\text{C}$ -NMR spectrum of **4** (126 MHz,  $\text{D}_2\text{O}$ , 298 K,  $1.2 \times 10^{-2}$  M).

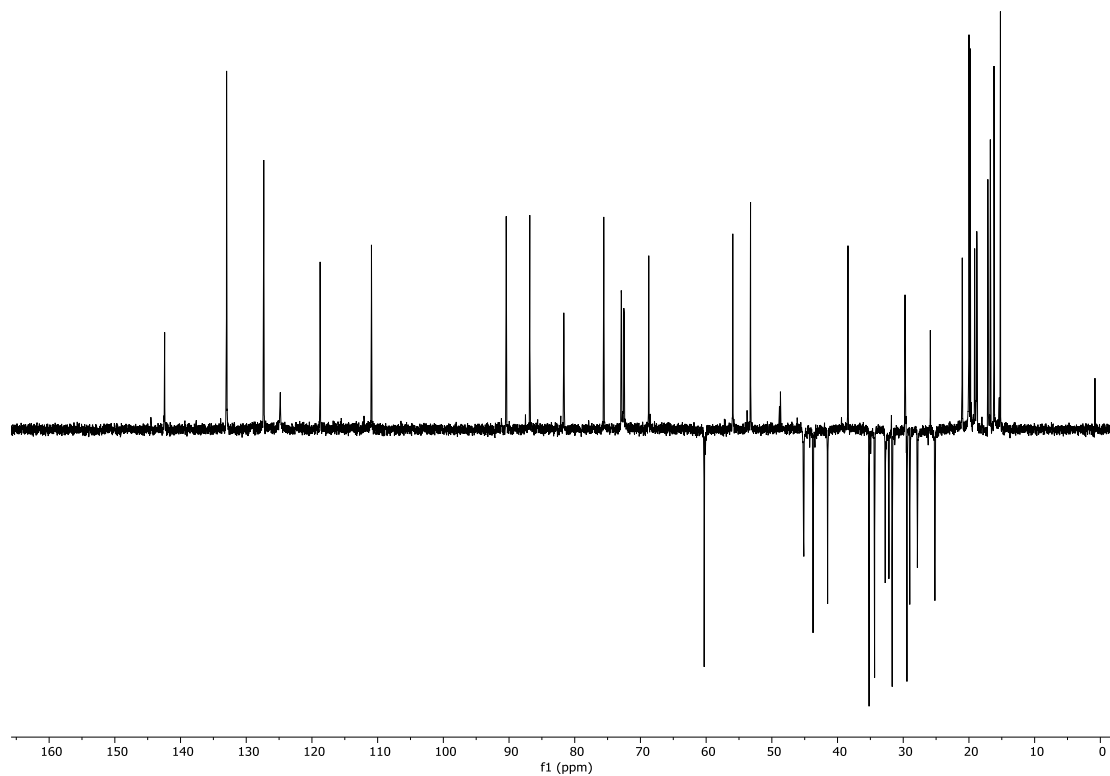

**Figure S8.** DEPT 135-NMR spectrum of **4** (126 MHz, D<sub>2</sub>O, 298 K, 1.2 x 10<sup>-2</sup> M).

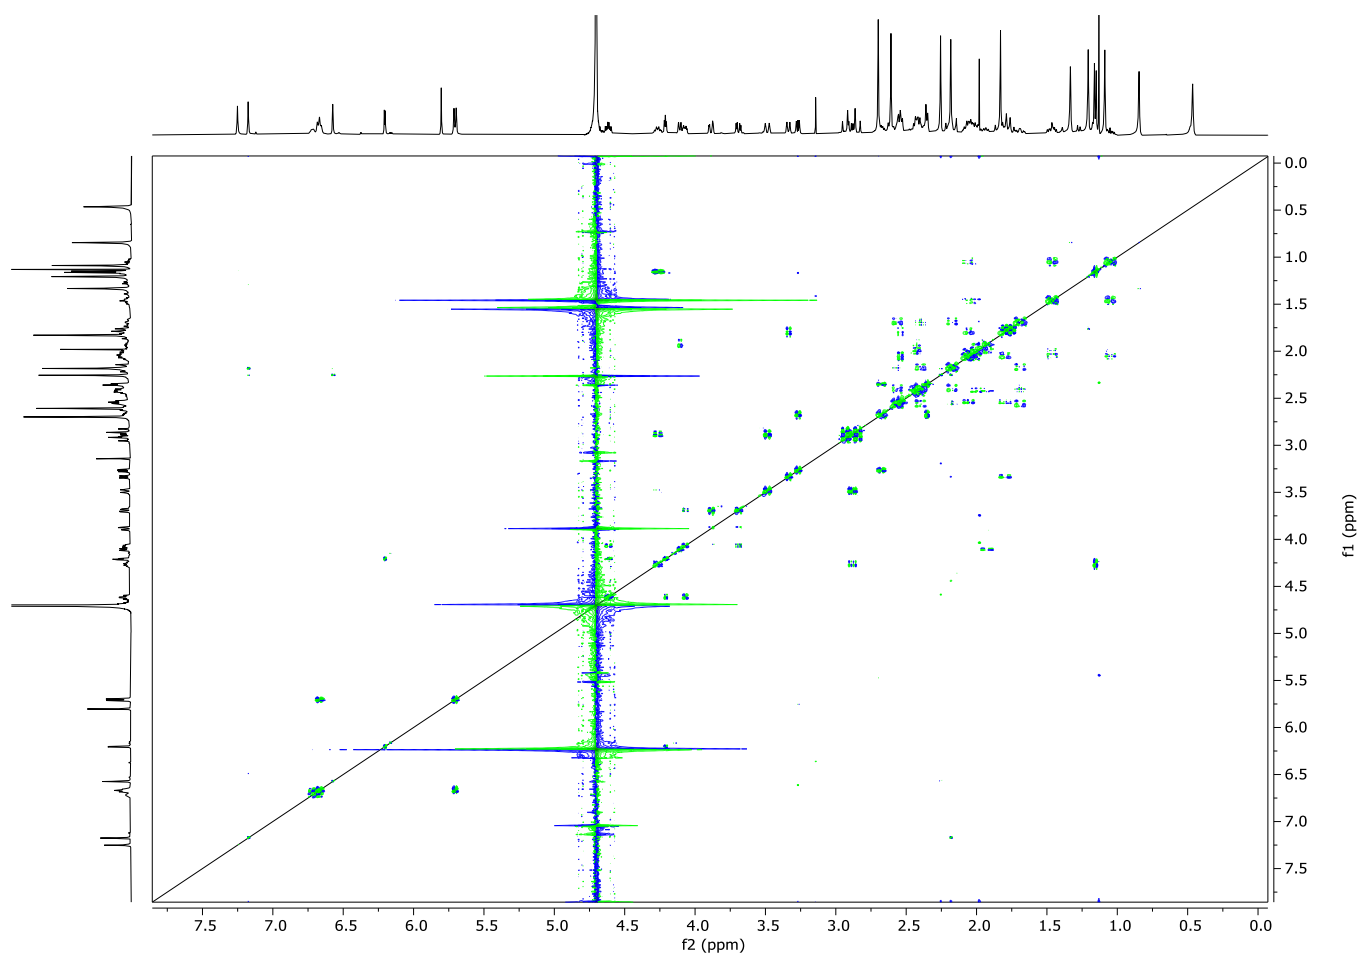

**Figure S9.** <sup>1</sup>H-<sup>1</sup>HDFQ-COSY spectrum of **4** (500 MHz, D<sub>2</sub>O, 298 K, 1024 x 2560 p, 12 scans, 1.2 x 10<sup>-2</sup> M).

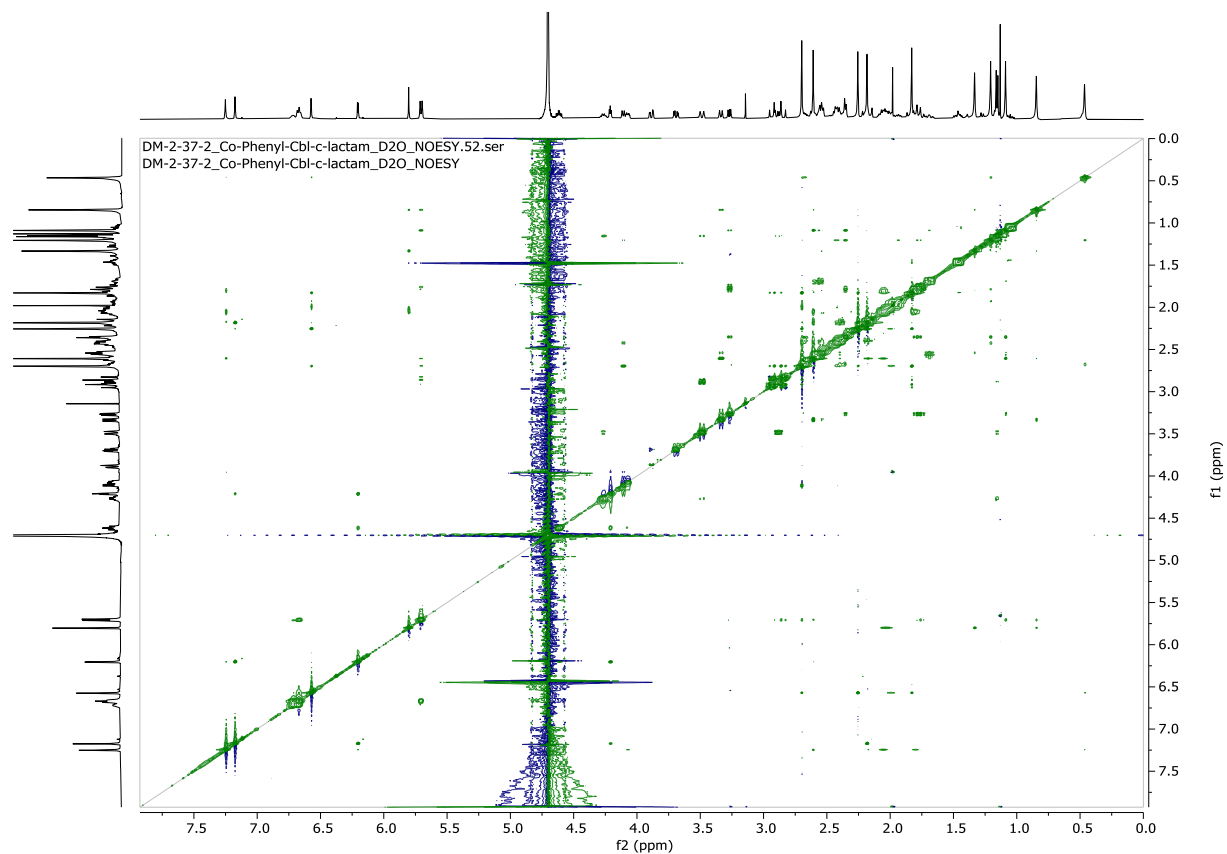

**Figure S10.**  $^1\text{H}$ - $^1\text{H}$ NOESY spectrum of **4** (500 MHz,  $\text{D}_2\text{O}$ , 298 K, 1024 x 1884 p, 16 scans,  $1.2 \times 10^{-2}$  M).

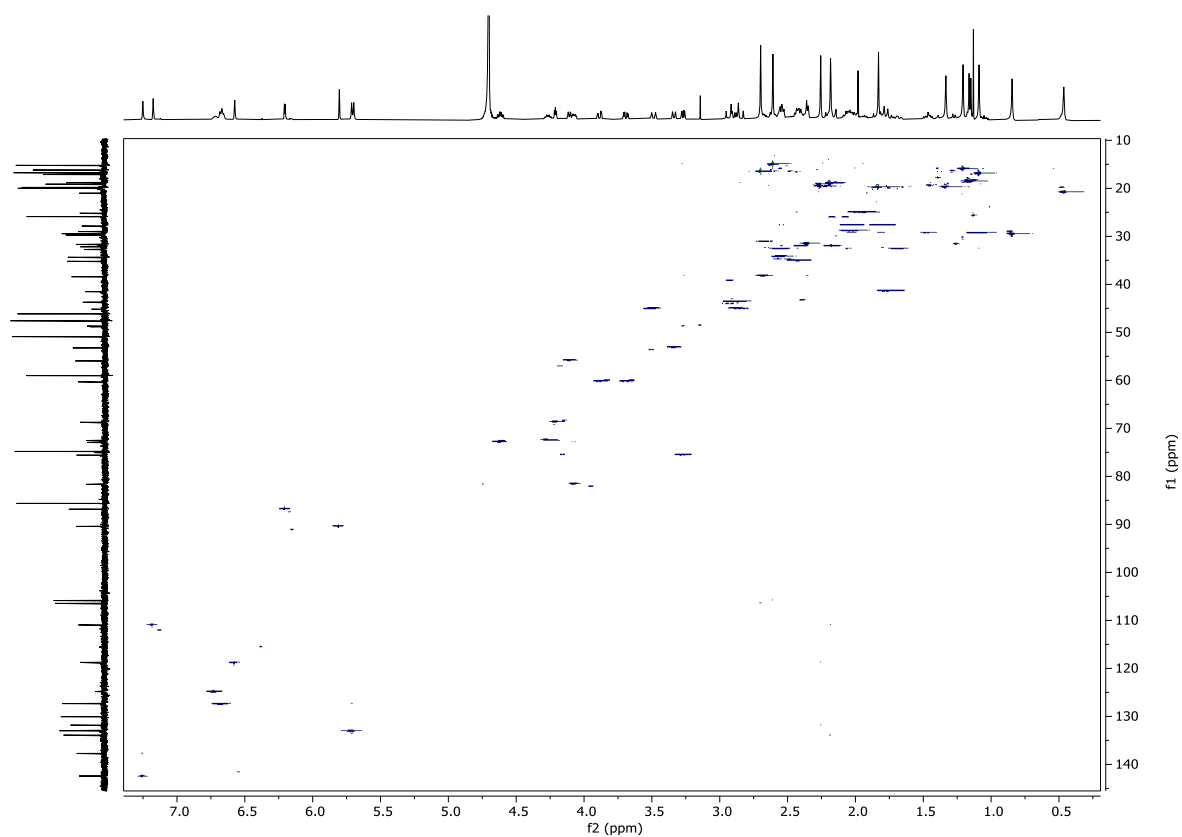

**Figure S11.**  $^1\text{H}$ - $^{13}\text{C}$ HSQC spectrum of **4** (500 MHz, 126 MHz,  $\text{D}_2\text{O}$  (presat), 298 K, 1024 x 5120 p, 18 scans,  $1.2 \times 10^{-2}$  M).

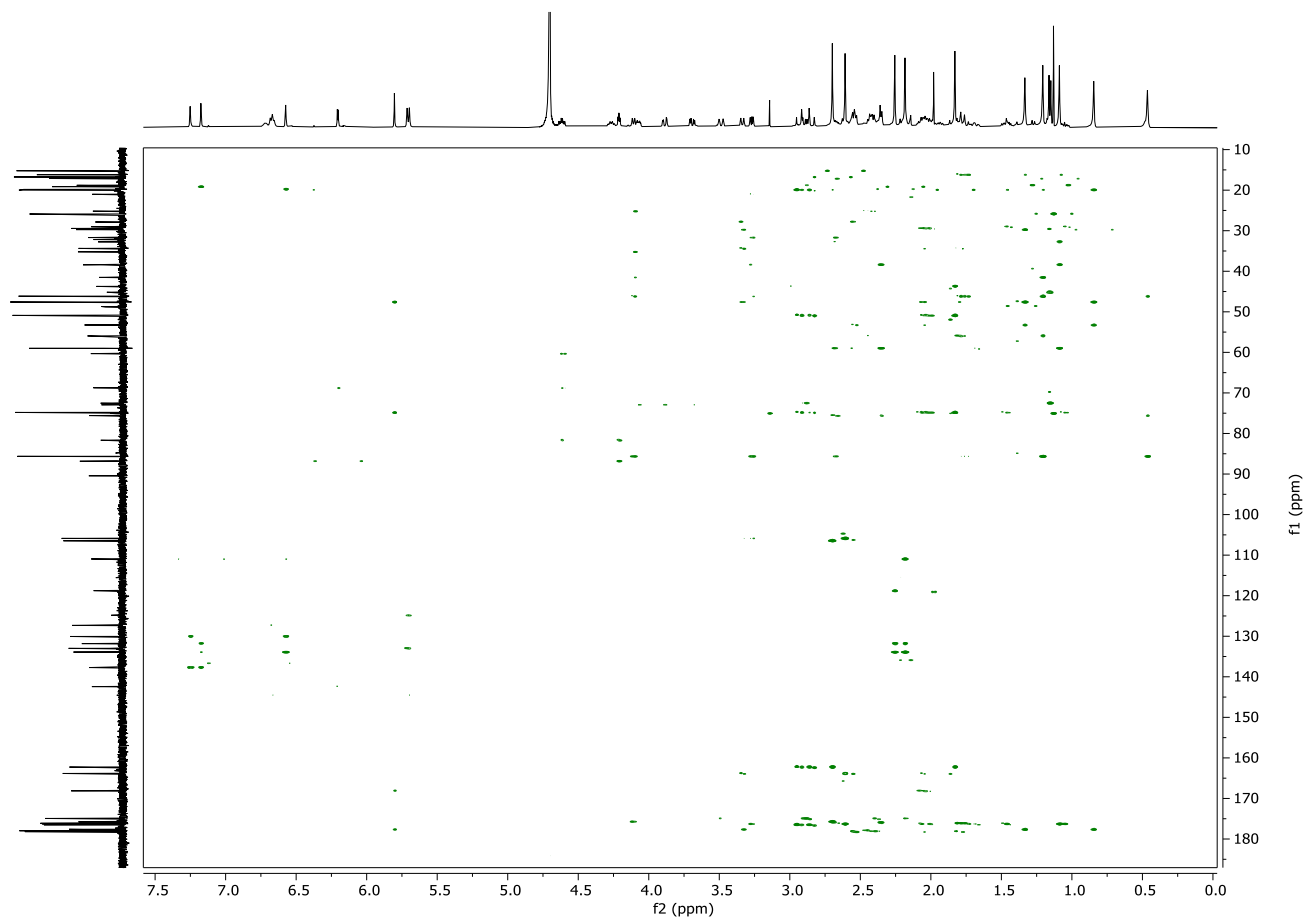

**Figure S12.**  $^1\text{H}$ - $^{13}\text{C}$ -HMBC spectrum of **4** (500 MHz, 126 MHz,  $\text{D}_2\text{O}$ , 298 K, 1024 x 3000 p, 12 scans,  $1.2 \times 10^{-2}$  M).

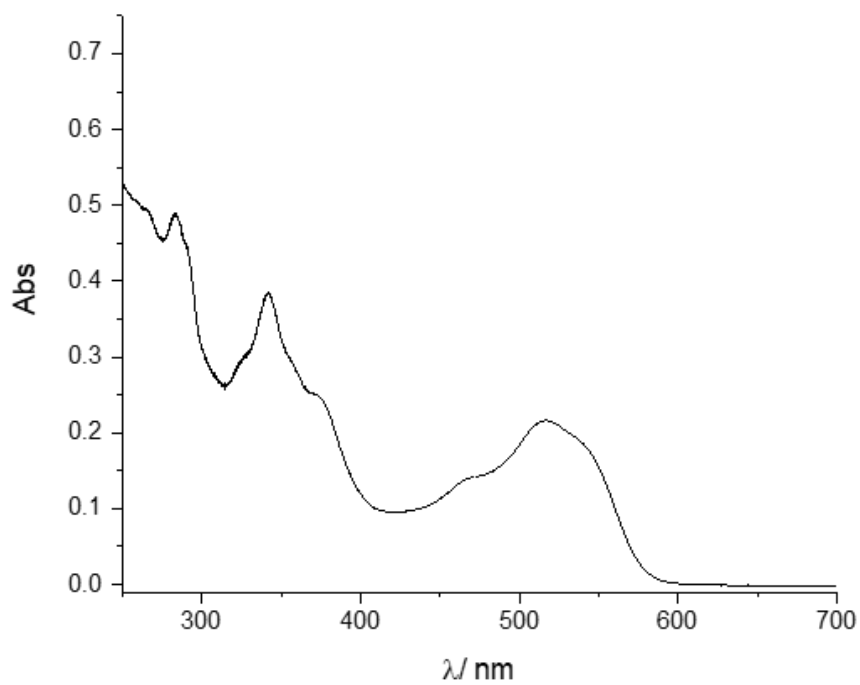

**Figure S13.** UV/Vis spectrum of **4** ( $\text{H}_2\text{O}$ ,  $3.9 \times 10^{-5}$  M).

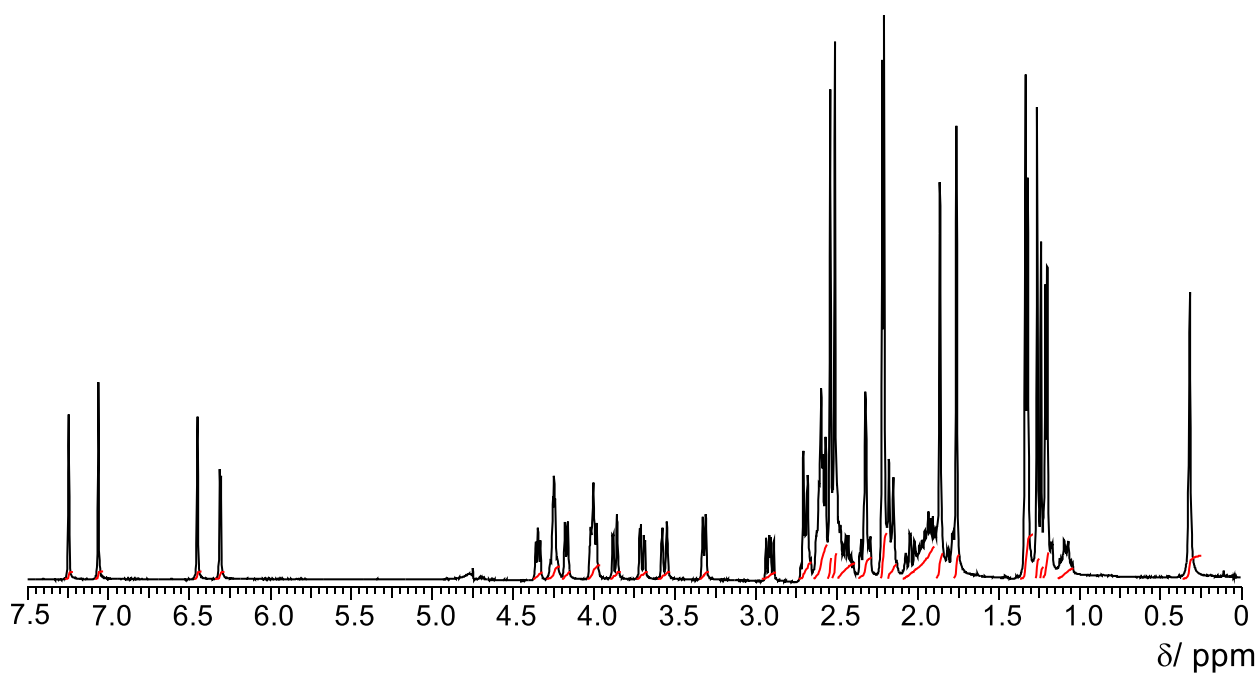

**Figure S14.** <sup>1</sup>H-NMR spectrum of **5** (500 MHz, D<sub>2</sub>O (presat), 298 K, 4.9 × 10<sup>-3</sup> M).

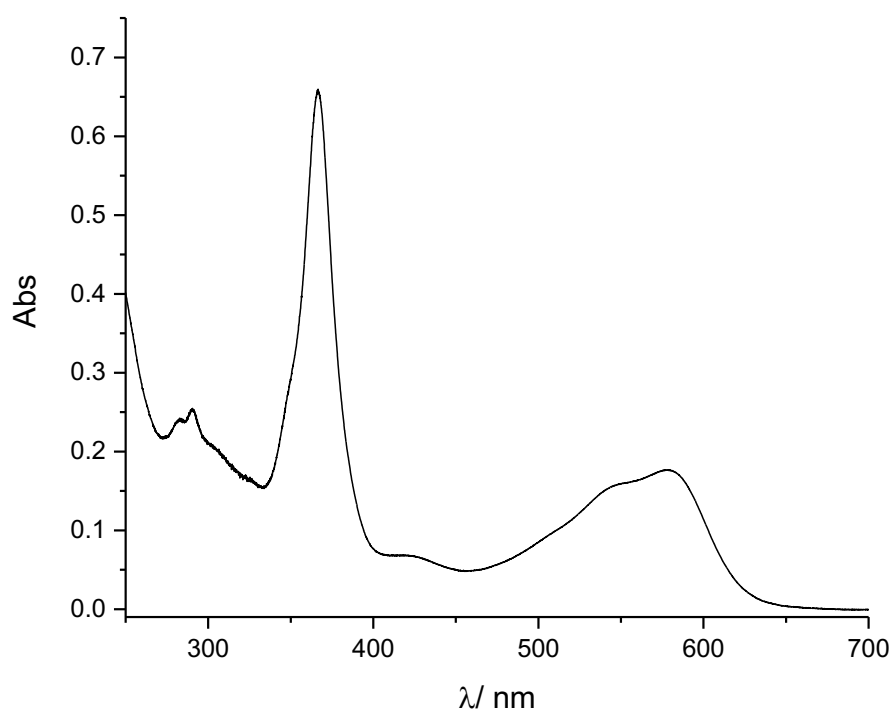

**Figure S15.** UV/Vis spectrum of **5** (H<sub>2</sub>O, 4.9 × 10<sup>-5</sup> M).

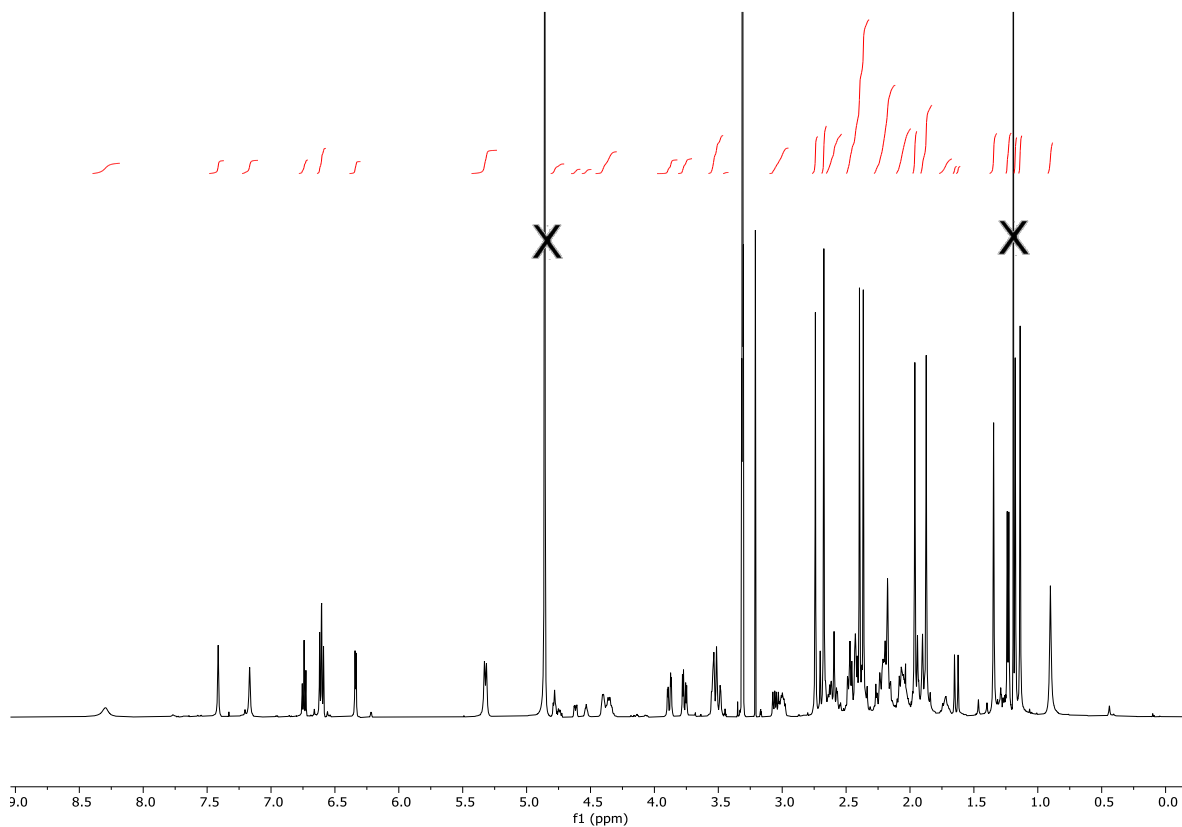

**Figure S16.**  $^1\text{H}$ -NMR spectrum of **7** (500 MHz,  $\text{CD}_3\text{OD}$  (presat), 298 K,  $8.7 \times 10^{-3}$  M).

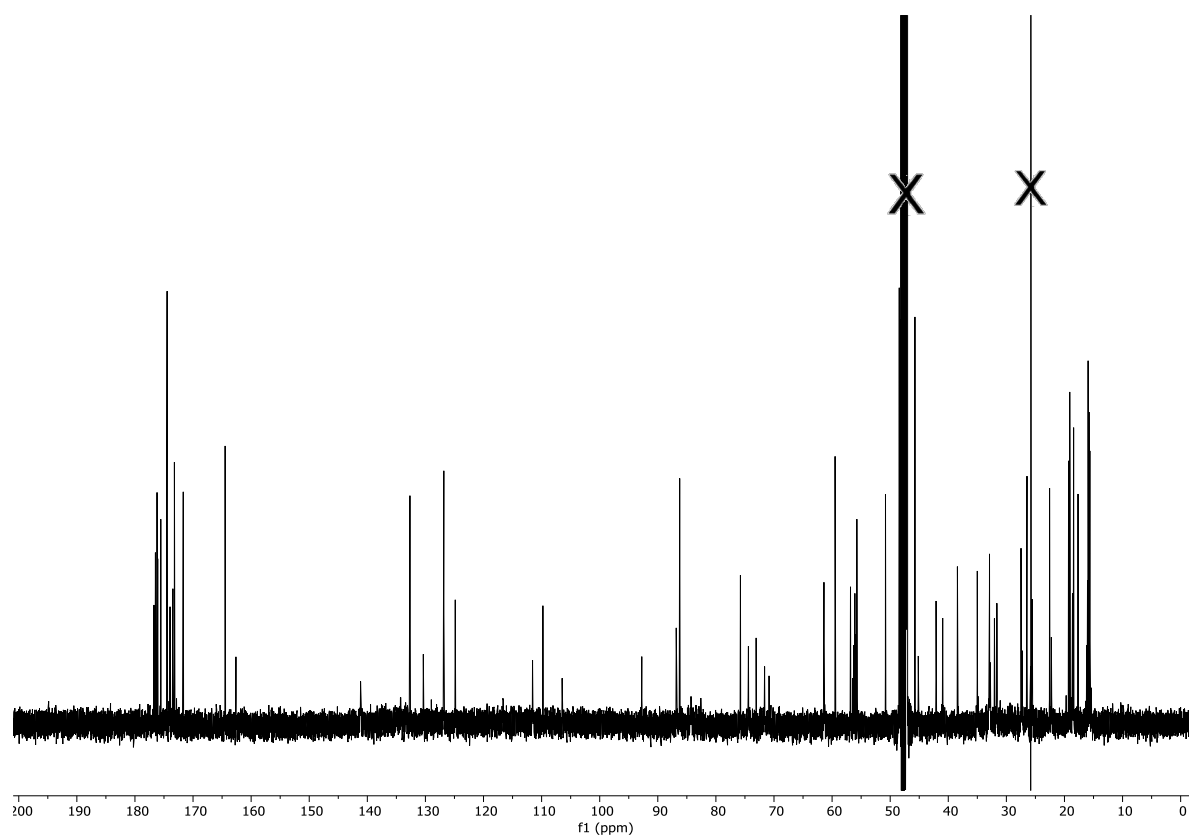

**Figure S17.**  $^{13}\text{C}$ -NMR spectrum of **7** (126 MHz,  $\text{CD}_3\text{OD}$  (presat), 298 K,  $8.7 \times 10^{-3}$  M).

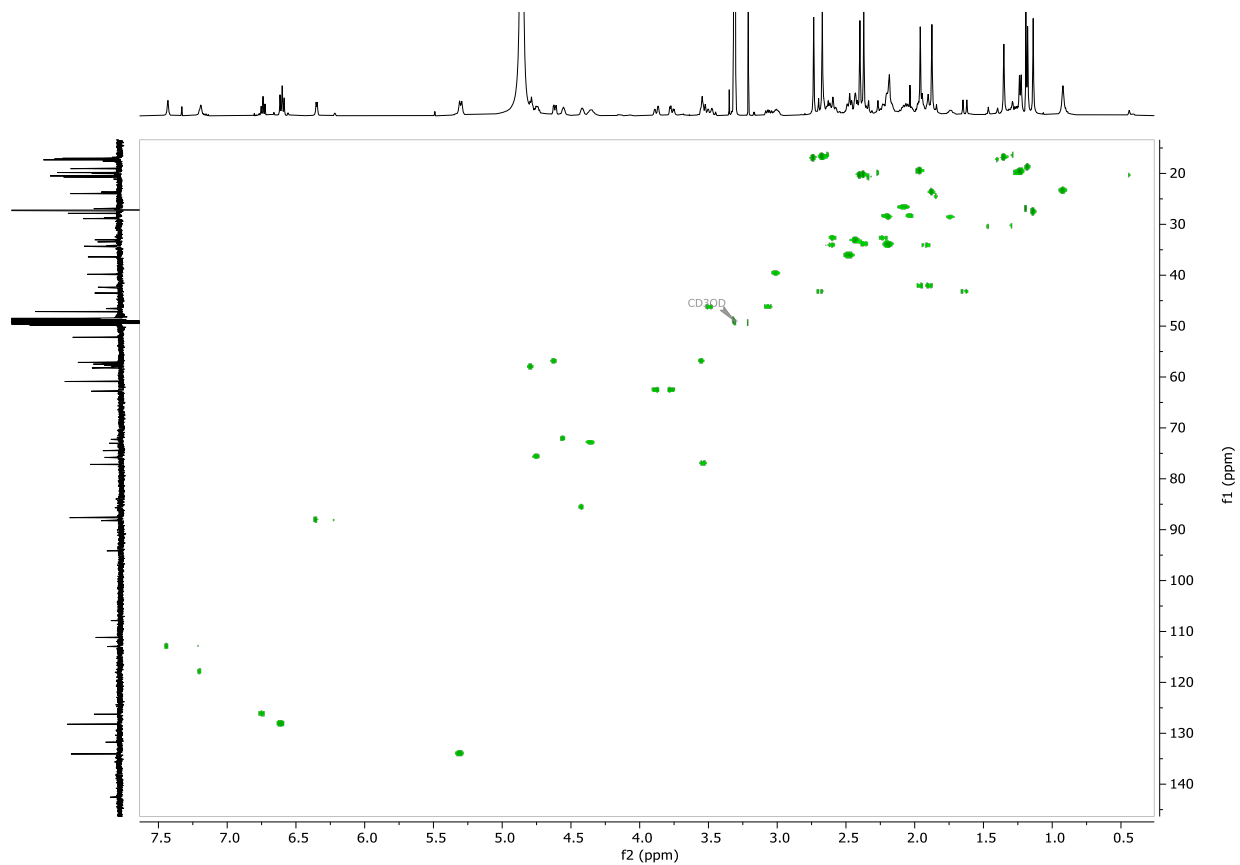

**Figure S18.**  $^1\text{H}$ - $^{13}\text{C}$  HSQC spectrum of **7** (500 MHz, 126 MHz,  $\text{CD}_3\text{OD}$ , 298 K, 1024 x 1024 p, 32 scans,  $8.7 \times 10^{-3}$  M).

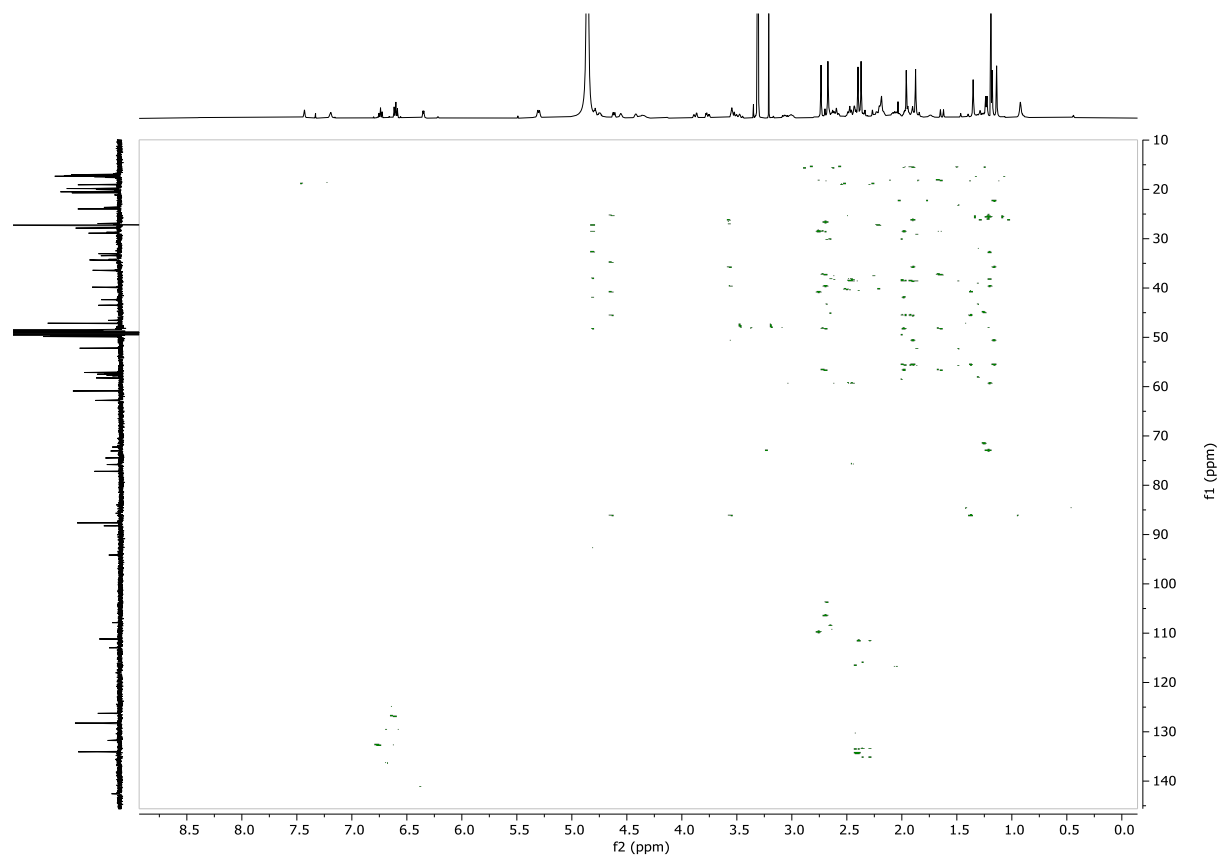

**Figure S19.**  $^1\text{H}$ - $^{13}\text{C}$  HMBC spectrum of **7** (500 MHz, 126 MHz,  $\text{CD}_3\text{OD}$ , 298 K, 1024 x 2341 p, 12 scans,  $8.7 \times 10^{-3}$  M).

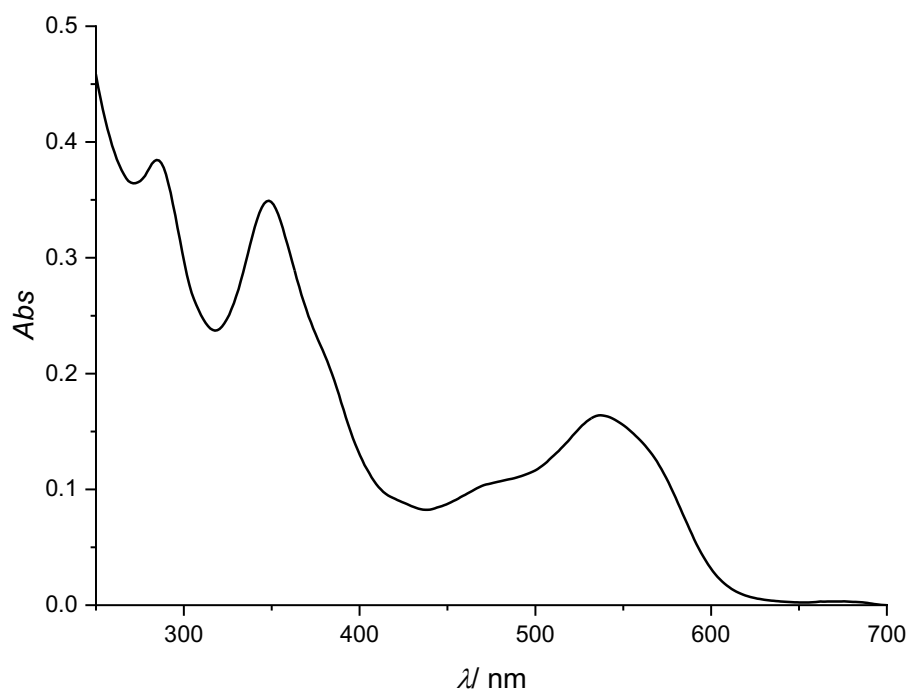

**Figure S20.** UV/Vis spectrum of **7** (H<sub>2</sub>O, 3.5 × 10<sup>-5</sup> M).

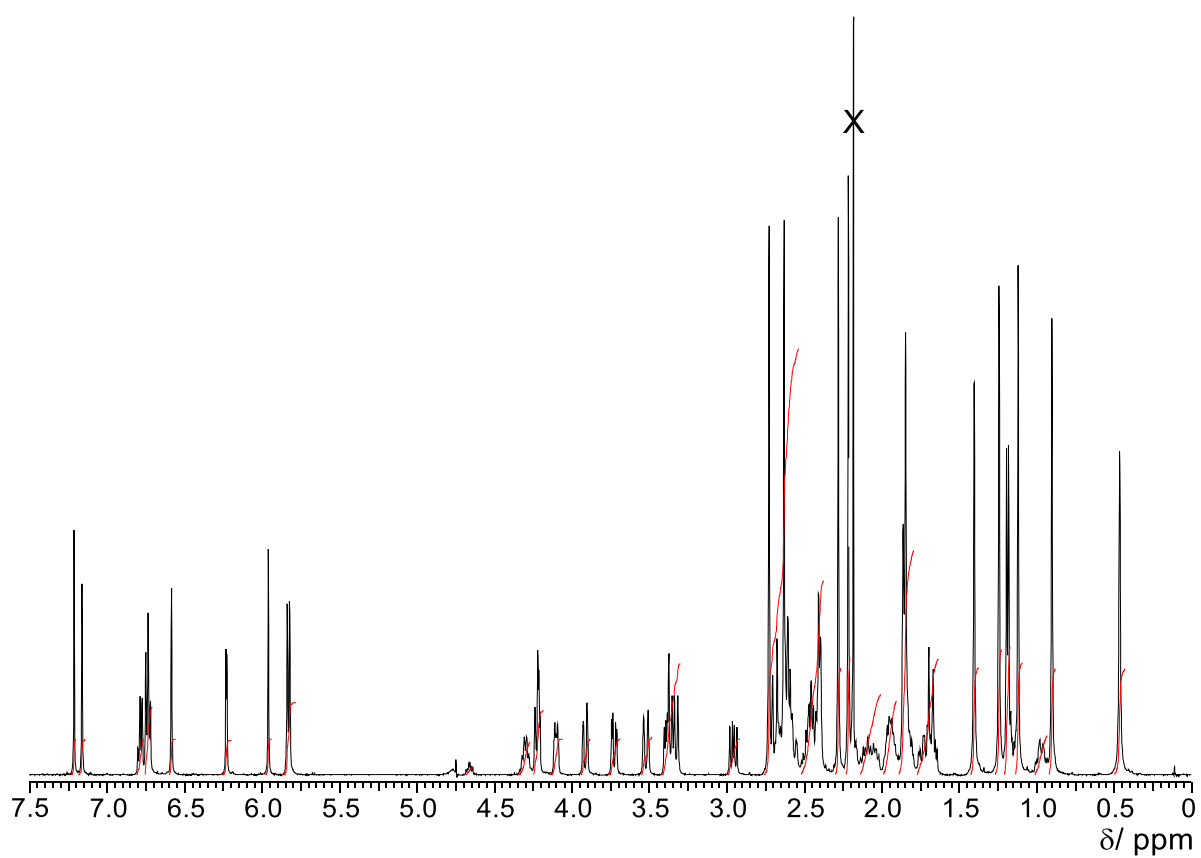

**Figure S21.** <sup>1</sup>H-NMR spectrum of **8**, **β-PhCbl** (500 MHz, D<sub>2</sub>O (presat), 298 K, 3.2 × 10<sup>-3</sup> M).



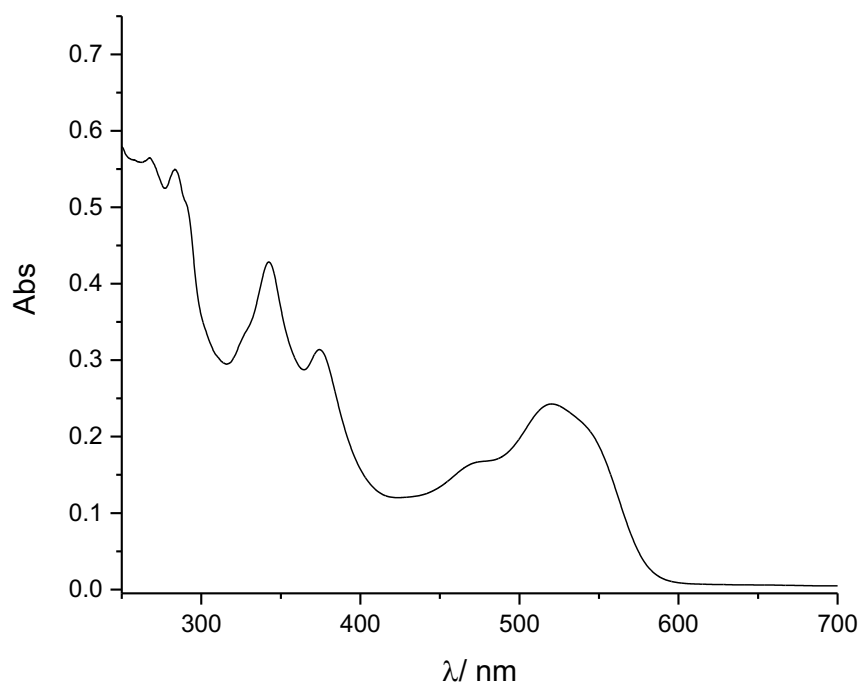

**Figure S22.** UV/Vis spectrum of **8**,  $\beta$ -PhCbl (H<sub>2</sub>O,  $6.3 \times 10^{-5}$  M).
